# Supplementary material
Source: ML conference proceedings conference paper supplement (https://openaccess.thecvf.com/content/ICCV2023/html/Kang_DDColor_Towards_Photo-Realistic_ICCV_2023_paper.html)
Supplement: Supplementary file 1 [file Kang_DDColor_Towards_Photo-Realistic_ICCV_2023_supplemental.pdf]

# Supplementary Materials for "DDColor: Towards Photo-Realistic Image Colorization via Dual Decoders"

Xiaoyang Kang    Tao Yang    Wenqi Ouyang    Peiran Ren    Lingzhi Li    Xuansong Xie  
DAMO Academy, Alibaba Group

In this supplementary document, we provide the following materials to complement the main manuscript:

- Detailed network architecture of DDColor;
- Additional qualitative results;
- Additional ablation study and visual results;
- Runtime analysis;
- More results on legacy black and white photos.

## 1. Detailed Network Architecture

We list the detailed architecture of DDColor with a ConvNeXt-T[5] backbone in Table 1. The resolution of the input image is  $256 \times 256$ .

## 2. Additional Qualitative Results

Here, we show more qualitative comparisons with previous methods on ImageNet[6] validation in Figure 3. As in the main paper, we compare our method with DeOldify [1], Wu *et al.* [8], ColTran [4], CT2 [7], BigColor [3] and ColorFormer [9]. The visual comparisons on COCO-Stuff[2] and ADE20K[10] are also presented in Figure 4 and 5, respectively. It can be seen that our method achieves more natural and vivid results in diverse scenarios, and produces more semantically consistent colors for a variety of objects.

## 3. Additional Ablation Study and Visual Results

We build four variants of our model with different ConvNeXt[5] backbones, as detailed in Table 2. As can be seen, the backbone plays a key role in image colorization. We choose ConvNeXt-L due to its superior performance.

More visual results on ablations of color decoder, colorfulness loss, and different visual feature scales are shown in Figure 1 and Figure 2.

## 4. Runtime Analysis

Our method colorizes grayscale images of resolution  $256 \times 256$  at 25 FPS / 21 FPS using ConvNeXt-T / ConvNeXt-L as the backbone. The inference speed of our end-to-end method is  $\times 96$  faster than the previous

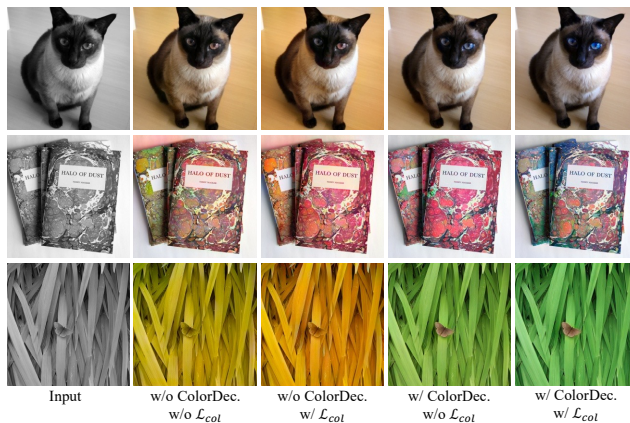

Figure 1. More visual results of ablation on color decoder and colorfulness loss.

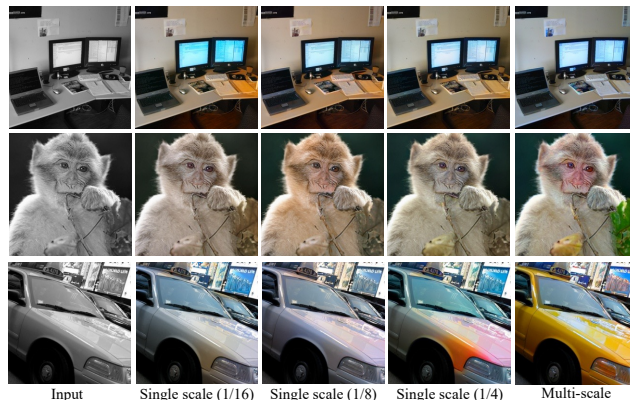

Figure 2. More visual results of ablation on different feature scales.

transformer-based method [4]. All tests are performed on a machine with an NVIDIA Tesla V100 GPU.

## 5. More Results on Legacy Black and White Photos

More colorization results on legacy black and white photos are shown in Figure 6, demonstrating the generalization capability of our method.

|            | Output size                 | DDColor                                                                                                                                                                                                                                                                                                                                                                                                                    |
|------------|-----------------------------|----------------------------------------------------------------------------------------------------------------------------------------------------------------------------------------------------------------------------------------------------------------------------------------------------------------------------------------------------------------------------------------------------------------------------|
| Stage 1    | $64 \times 64 \times 96$    | Conv. $4 \times 4$ , 96, stride 4<br><span style="border: 1px solid black; padding: 2px;">Depthwise Conv. <math>7 \times 7</math>, 96<br/> Conv. <math>1 \times 1</math>, 384<br/> Conv. <math>1 \times 1</math>, 96</span> <span style="float: right;">× 3</span>                                                                                                                                                         |
| Stage 2    | $32 \times 32 \times 192$   | Depthwise Conv. $7 \times 7$ , 192<br>Conv. $1 \times 1$ , 768<br>Conv. $1 \times 1$ , 192 <span style="float: right;">× 3</span>                                                                                                                                                                                                                                                                                          |
| Stage 3    | $16 \times 16 \times 384$   | Depthwise Conv. $7 \times 7$ , 384<br>Conv. $1 \times 1$ , 1536<br>Conv. $1 \times 1$ , 384 <span style="float: right;">× 9</span>                                                                                                                                                                                                                                                                                         |
| Stage 4    | $8 \times 8 \times 768$     | Depthwise Conv. $7 \times 7$ , 768<br>Conv. $1 \times 1$ , 3072<br>Conv. $1 \times 1$ , 768 <span style="float: right;">× 3</span>                                                                                                                                                                                                                                                                                         |
| Stage 5    | $16 \times 16 \times 512$   | PixelShuffle, scale 2<br>Concat feat. from Stage 3<br>Conv. $3 \times 3$ , 512                                                                                                                                                                                                                                                                                                                                             |
| Stage 6    | $32 \times 32 \times 512$   | PixelShuffle, scale 2<br>Concat feat. from Stage 2<br>Conv. $3 \times 3$ , 512                                                                                                                                                                                                                                                                                                                                             |
| Stage 7    | $64 \times 64 \times 256$   | PixelShuffle, scale 2<br>Concat feat. from Stage 1<br>Conv. $3 \times 3$ , 256                                                                                                                                                                                                                                                                                                                                             |
| Stage 8    | $256 \times 256 \times 256$ | PixelShuffle, scale 4                                                                                                                                                                                                                                                                                                                                                                                                      |
| Color Dec. | $256 \times 100$            | Conv. $1 \times 1$ , 256 feat. from Stage 5<br>Conv. $1 \times 1$ , 256 feat. from Stage 6<br>Conv. $1 \times 1$ , 256 feat. from Stage 7<br><span style="border: 1px solid black; padding: 2px;">Conv. <math>1 \times 1</math>, <math>256 \times 3</math><br/> Cross-attn.<br/> Self-attn.<br/> Conv. <math>1 \times 1</math>, 2048<br/> Conv. <math>1 \times 1</math>, 256</span> <span style="float: right;">× 9</span> |
| Stage 9    | $256 \times 256 \times 100$ | Dot Product feat. from Stage 8<br>& feat. from Color Dec.                                                                                                                                                                                                                                                                                                                                                                  |
| Stage 10   | $256 \times 256 \times 2$   | Concat input<br>Conv. $1 \times 1$ , 2                                                                                                                                                                                                                                                                                                                                                                                     |

Table 1. Detailed architecture of DDColor.

| Model Name | Backbone   | FID↓        | CF↑          | $\Delta$ CF↓ | Params |
|------------|------------|-------------|--------------|--------------|--------|
| DDColor-T  | ConvNeXt-T | 4.38        | 37.66        | 0.55         | 55.0M  |
| DDColor-S  | ConvNeXt-S | 4.25        | 38.10        | 0.11         | 76.6M  |
| DDColor-B  | ConvNeXt-B | 4.06        | 38.15        | 0.06         | 116.2M |
| DDColor-L  | ConvNeXt-L | <b>3.92</b> | <b>38.26</b> | <b>0.05</b>  | 227.9M |

Table 2. **Backbone variants.** We build four variants of our DDColor based on backbones of different sizes. The overall performance improves with the increase of the scale of the backbone network.

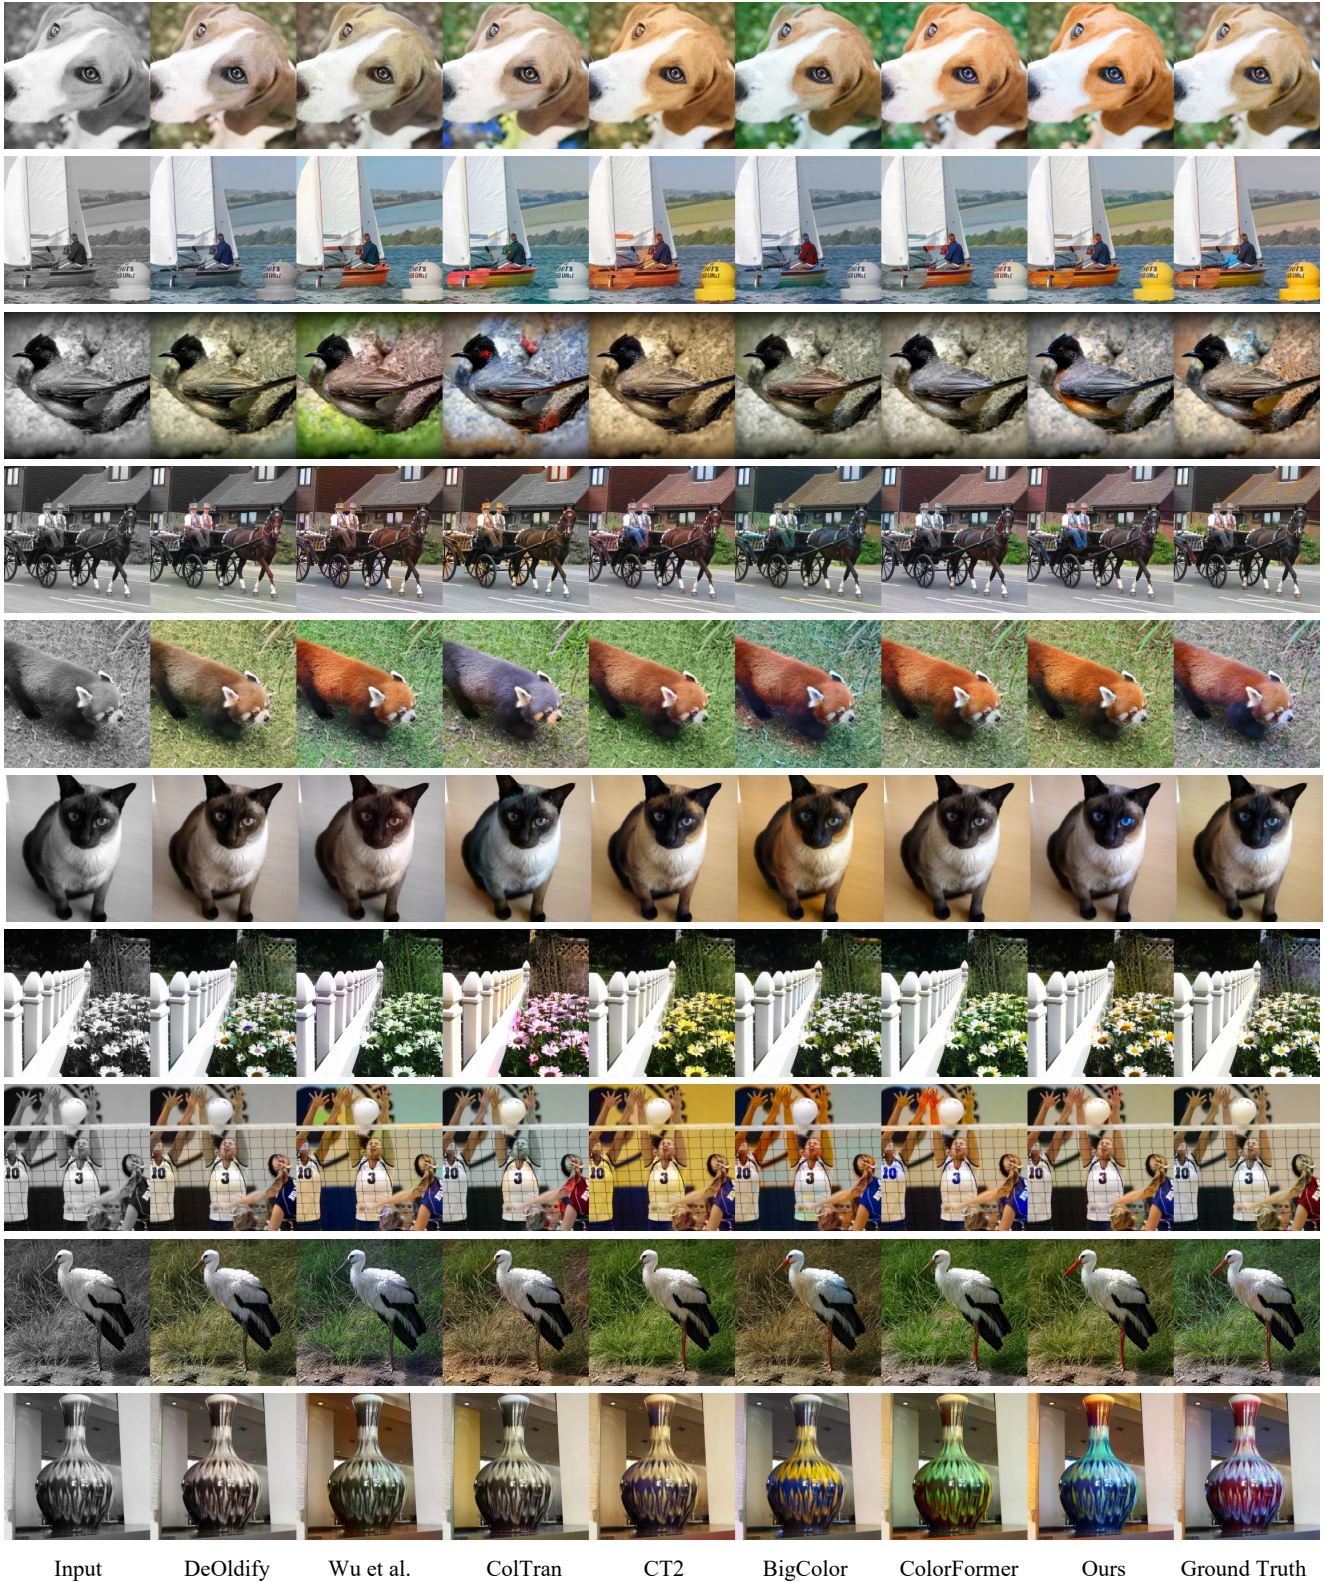

Figure 3. More qualitative comparisons with previous colorization methods on ImageNet.

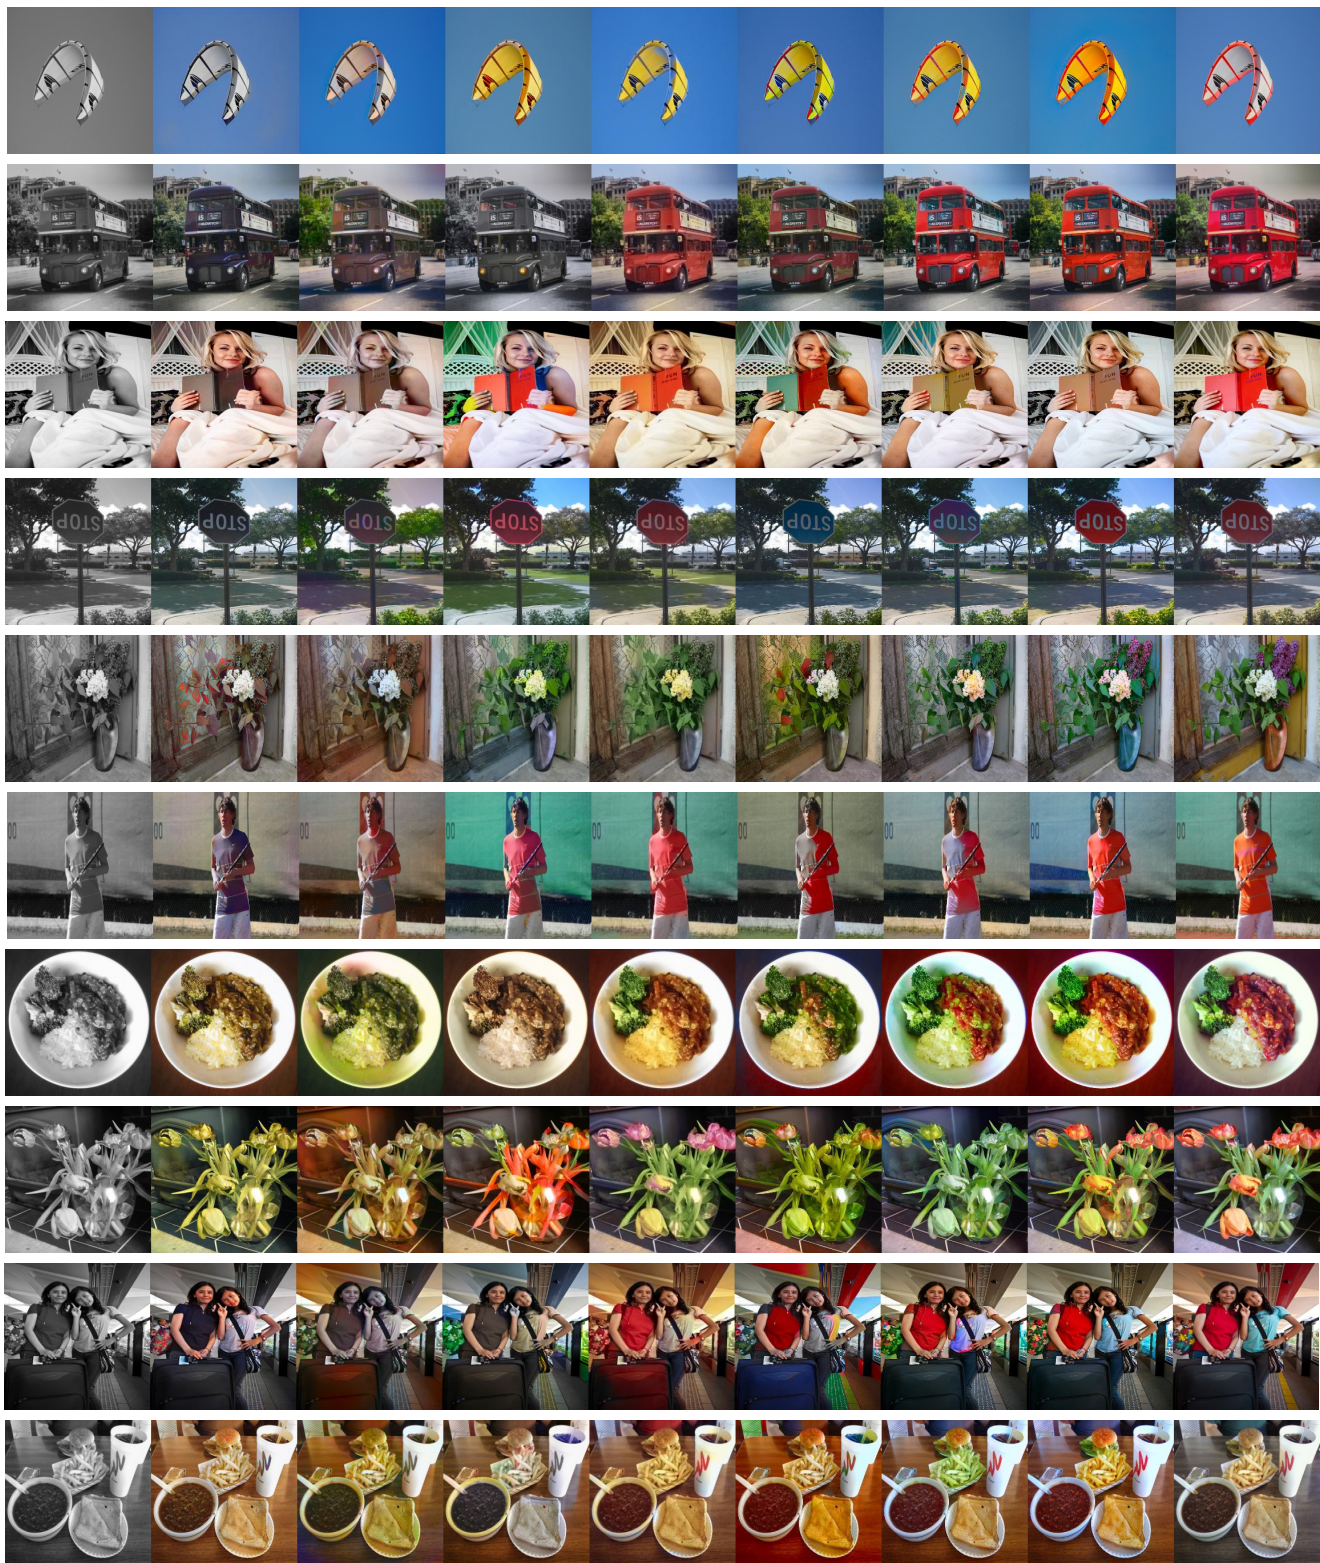

Input DeOldify Wu et al. ColTran CT2 BigColor ColorFormer Ours Ground Truth

Figure 4. Qualitative comparisons with previous colorization methods on COCO-Stuff.

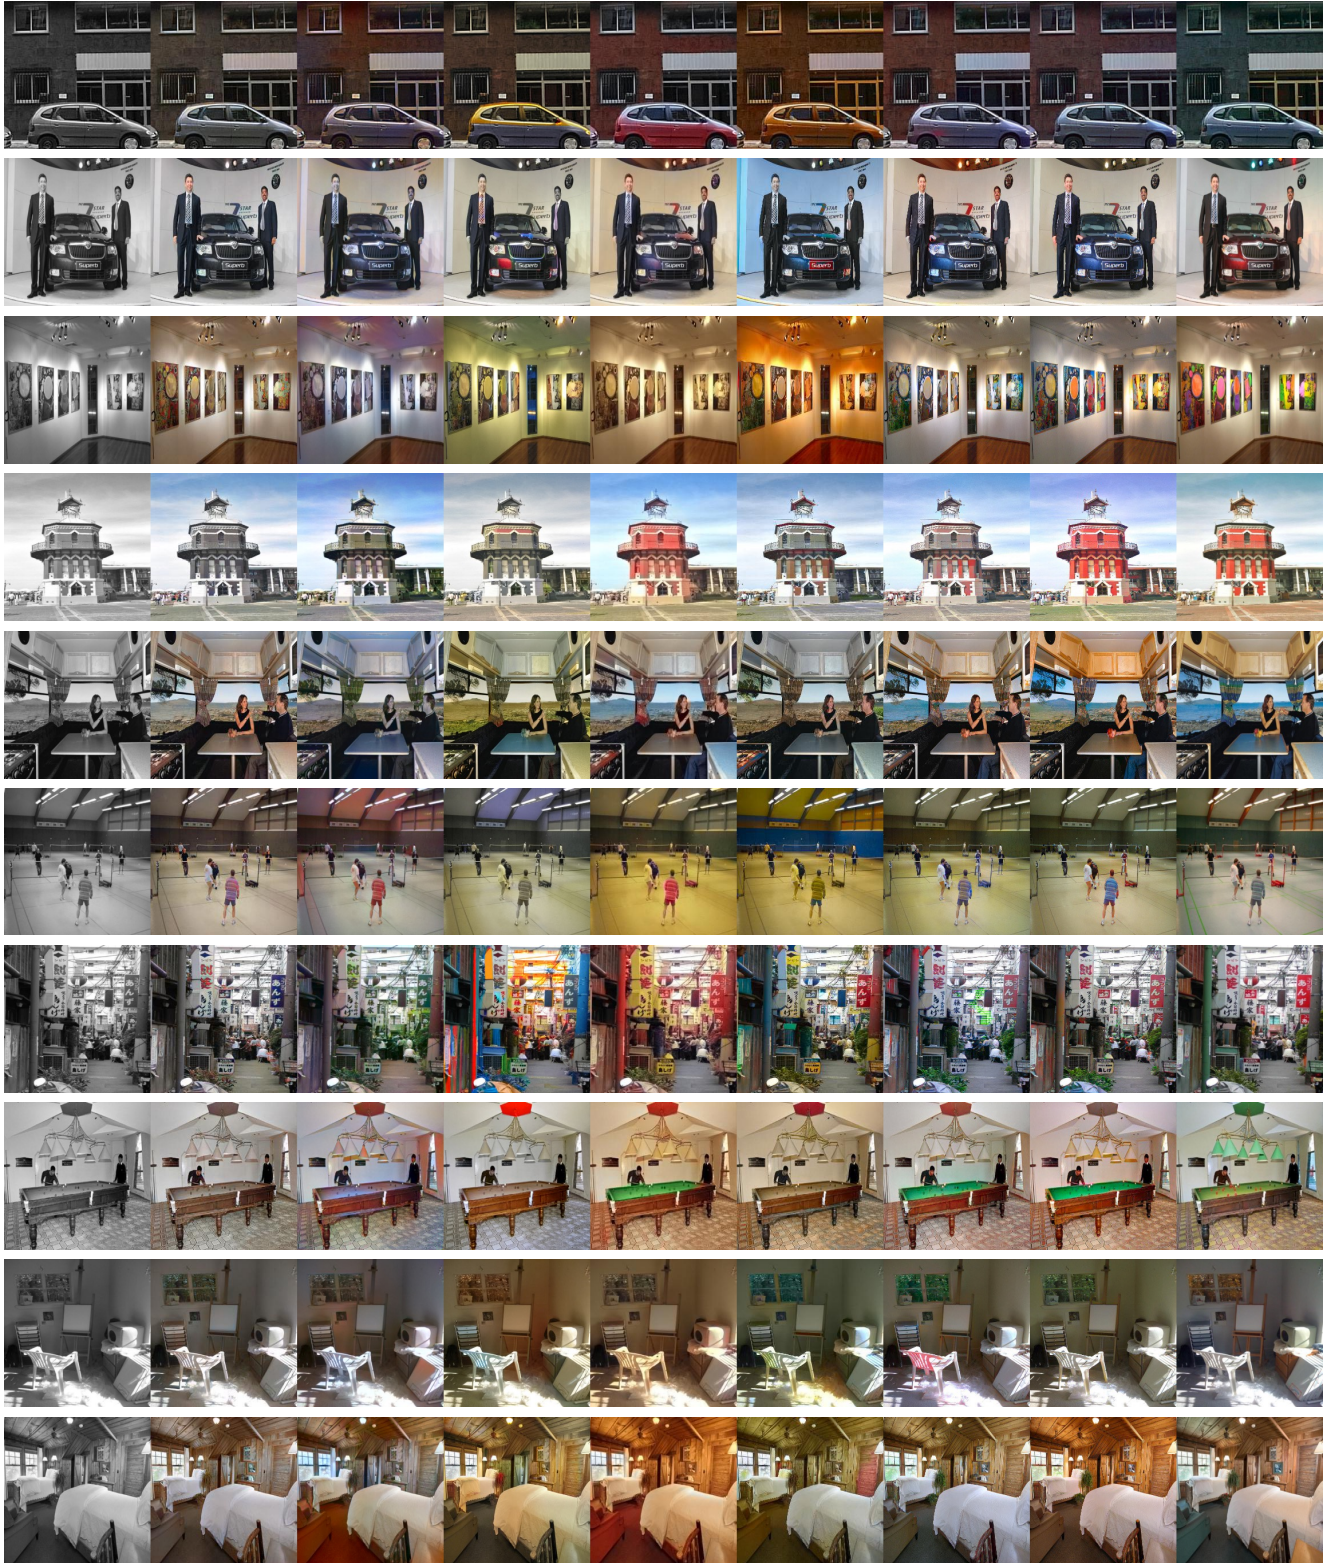

Input DeOldify Wu et al. ColTran CT2 BigColor ColorFormer Ours Ground Truth

Figure 5. Qualitative comparisons with previous colorization methods on ADE20K.

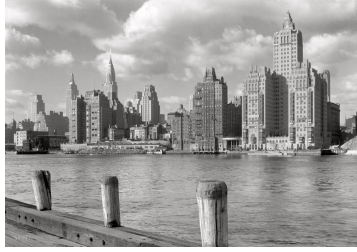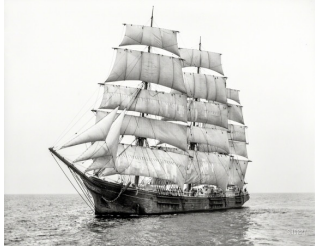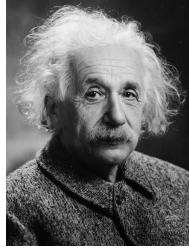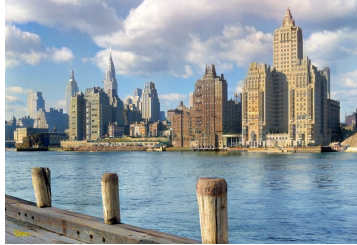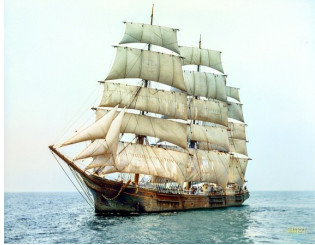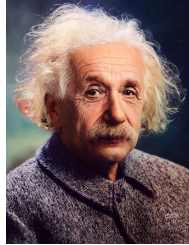

1931. "New York Riverfront."

1899. "Sailing ship Mary L. Cushing."

1947. "Albert Einstein."

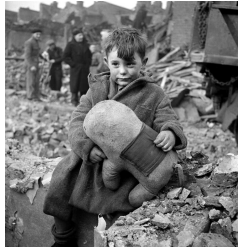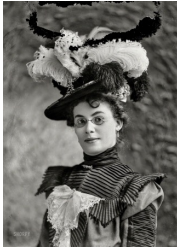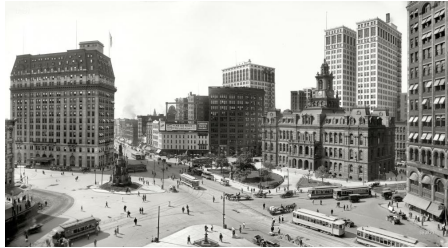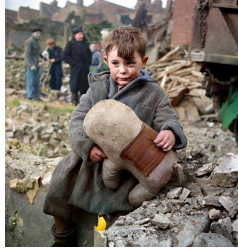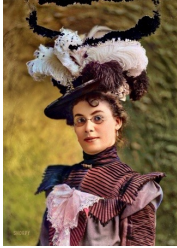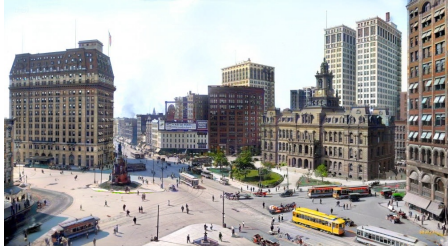

1945. "Abandoned boy holding a stuffed toy animal."

circa 1894-1901. "Miss H.M. Craig."

1915. "Woodward Avenue and Campus Martius, Detroit, Michigan."

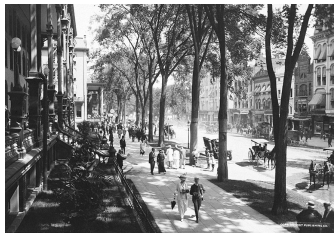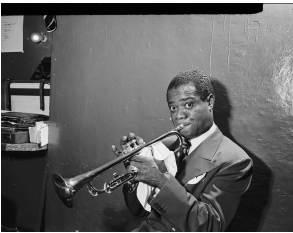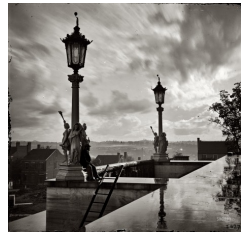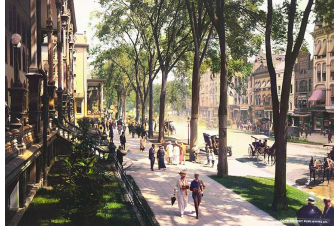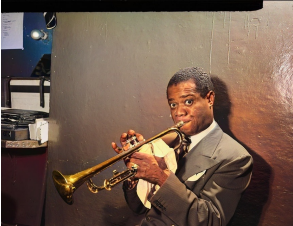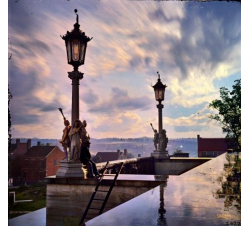

circa 1900-1915. "Broadway at the United States Hotel Saratoga Springs."

1946. "Louis Armstrong practicing in his dressing room."

1864. "View from the Capitol at Nashville, Tennessee."

Figure 6. More results on legacy black and white photos.

## References

- [1] Jason Antic. jantic/deoldify: A deep learning based project for colorizing and restoring old images (and video!). <https://github.com/jantic/DeOldify>, 2019. **1**
- [2] Holger Caesar, Jasper Uijlings, and Vittorio Ferrari. Cocosuff: Thing and stuff classes in context. In *Proceedings of the IEEE conference on computer vision and pattern recognition*, pages 1209–1218, 2018. **1**
- [3] Kim Geonung, Kang Kyoungkook, Kim Seongtae, Lee Hwayoon, Kim Sehoon, Kim Jonghyun, Baek Seung-Hwan, and Cho Sunghyun. Bigcolor: Colorization using a generative color prior for natural images. In *European Conference on Computer Vision (ECCV)*, 2022. **1**
- [4] Manoj Kumar, Dirk Weissenborn, and Nal Kalchbrenner. Colorization transformer. In *International Conference on Learning Representations*, 2021. **1**
- [5] Zhuang Liu, Hanzi Mao, Chao-Yuan Wu, Christoph Feichtenhofer, Trevor Darrell, and Saining Xie. A convnet for the 2020s. In *Proceedings of the IEEE/CVF Conference on Computer Vision and Pattern Recognition*, pages 11976–11986, 2022. **1**
- [6] Olga Russakovsky, Jia Deng, Hao Su, Jonathan Krause, Sanjeev Satheesh, Sean Ma, Zhiheng Huang, Andrej Karpathy, Aditya Khosla, Michael Bernstein, et al. Imagenet large scale visual recognition challenge. *International journal of computer vision*, 115(3):211–252, 2015. **1**
- [7] Shuchen Weng, Jimeng Sun, Yu Li, Si Li, and Boxin Shi. Ct2: Colorization transformer via color tokens. In *European Conference on Computer Vision (ECCV)*, 2022. **1**
- [8] Yanze Wu, Xintao Wang, Yu Li, Honglun Zhang, Xun Zhao, and Ying Shan. Towards vivid and diverse image colorization with generative color prior. In *Proceedings of the IEEE/CVF International Conference on Computer Vision*, 2021. **1**
- [9] Ji Xiaozhong, Boyuan Jiang, Luo Donghao, Tao Guangpin, Chu Wenqing, Xie Zhifeng, Wang Chengjie, and Tai Ying. Colorformer: Image colorization via color memory assisted hybrid-attention transformer. In *European Conference on Computer Vision (ECCV)*, 2022. **1**
- [10] Bolei Zhou, Hang Zhao, Xavier Puig, Sanja Fidler, Adela Barriuso, and Antonio Torralba. Scene parsing through ade20k dataset. In *Proceedings of the IEEE conference on computer vision and pattern recognition*, pages 633–641, 2017. **1**
